# Supplementary material
Source: PubMed Central journal article supplement (PMC6637980)
Supplement: MPP-19-1075-s004.pdf [file MPP-19-1075-s004.pdf]

| Virus        | ID           | Genus                  | aa position | eee                                                                                   | hh                                                                                                                           | hhhh                                                                                                     | hh | ee                                                                                       |
|--------------|--------------|------------------------|-------------|---------------------------------------------------------------------------------------|------------------------------------------------------------------------------------------------------------------------------|----------------------------------------------------------------------------------------------------------|----|------------------------------------------------------------------------------------------|
| TSWV         | AEK06236     | <i>Tospovirus</i>      | 111         | ---ANKV <b>I</b> KI---                                                                | CPTWD---                                                                                                                     |                                                                                                          |    | -----SRKQ <b>Y</b> M-----                                                                |
| RCNMV        | NP_620546    | <i>Dianthovirus</i>    | 33          | ---GVSEAPL---                                                                         | IPAS <b>M</b> SKITDY---                                                                                                      | AKTTAK---                                                                                                |    | -----GNSVAL-----                                                                         |
| SBWMV        | NP_049337    | <i>Furovirus</i>       | 44          | ---RYVEKAL---                                                                         | TQPGV <b>V</b> TKMQDA---                                                                                                     | WTNWTKTN---                                                                                              |    | -----KEEGTPY <b>N</b> M-----                                                             |
| CMoV         | YP_002302261 | <i>Umbravirus</i>      | 42          | ---TL <b>T</b> HTPL---                                                                | YPRR <b>Q</b> LTL <b>S</b> RF---                                                                                             | FSGRWR---                                                                                                |    | -----TKKTGG <b>M</b> L-----                                                              |
| CNSV         | NP_733974    | <i>Nepovirus B</i>     | 432         | ---V <b>L</b> NR---                                                                   | PE <b>Y</b> N---AL <b>N</b> KL---                                                                                            | AEAGW---                                                                                                 |    | -----KEA-----                                                                            |
| OuMV         | YP_002019758 | <i>Ourmiavirus</i>     | 57          | ---VED <b>P</b> I <b>A</b> L---                                                       | IP <b>H</b> GI <b>W</b> SIF <b>K</b> SK---                                                                                   | LAQMR---                                                                                                 |    | -----CPKG <b>Y</b> I-----                                                                |
| PoLV         | YP_009032637 | <i>Aureovirus</i>      | 30          | ---TK <b>A</b> L <b>L</b> P <b>L</b> ---                                              | APIS <b>Q</b> FS <b>K</b> W <b>K</b> IP---                                                                                   |                                                                                                          |    | -----KQGF <b>Y</b> -----                                                                 |
| CPsV         | YP_089663    | <i>Ophiovirus</i>      | 84          | ---H <b>K</b> KL <b>L</b> K <b>L</b> ---                                              | G <b>T</b> L <b>K</b> ---S <b>I</b> T <b>D</b> K---                                                                          | L <b>R</b> KL <b>G</b> G---                                                                              |    | -----ESS <b>Q</b> P <b>F</b> I-----                                                      |
| CPMV         | NP_734000    | <i>Comovirus</i>       | 204         | ---T <b>V</b> L <b>D</b> L <b>P</b> V---                                              | TK <b>D</b> K---T <b>L</b> AMA---                                                                                            | S <b>D</b> F <b>I</b> R <b>K</b> ---                                                                     |    | -----ENL <b>K</b> T <b>S</b> A <b>I</b> -----                                            |
| CiLV-C       | YP_654542    | <i>Cilevirus</i>       | 47          | ---R <b>I</b> GV <b>G</b> F <b>L</b> ---                                              | T <b>P</b> N <b>D</b> ---M <b>I</b> S <b>R</b> L---                                                                          | V <b>G</b> F <b>I</b> N <b>R</b> KA <b>E</b> D <b>A</b> G <b>V</b> R <b>S</b> V <b>E</b> S <b>F</b> R--- |    | -----                                                                                    |
| CRLV         | YP_081449    | <i>Cheravirus</i>      | 109         | ---D <b>P</b> Y <b>V</b> A <b>V</b> Y <b>T</b> PL <b>P</b> H <b>I</b> T <b>E</b> E--- | Q <b>A</b> R <b>K</b> L---                                                                                                   | M-----                                                                                                   |    | -----E <b>K</b> G <b>F</b> S <b>N</b> S-----                                             |
| GFLV         | NP_733995    | <i>Nepovirus A</i>     | 118         | ---N <b>T</b> L <b>E</b> I <b>L</b> Y <b>N</b> ---                                    | P <b>V</b> S <b>E</b> E---E <b>M</b> E <b>E</b> Y---                                                                         | R-----                                                                                                   |    | -----D <b>R</b> G <b>M</b> S <b>A</b> V-----                                             |
| RSV          | NP_620519    | <i>Tenuivirus</i>      | 88          | ---A <b>T</b> F <b>N</b> I---                                                         | L <b>V</b> D <b>P</b> ---Y <b>W</b> F <b>H</b> Q---                                                                          | PL-----                                                                                                  |    | -----T <b>H</b> Y <b>P</b> F <b>R</b> V <b>T</b> H <b>Y</b> P <b>F</b> F <b>R</b> V----- |
| ACLSV        | NP_040552    | <i>Tricovirus</i>      | 62          | ---R <b>L</b> A <b>S</b> I <b>P</b> V---                                              | I <b>P</b> S <b>S</b> ---E <b>V</b> Q <b>A</b> V---                                                                          | L <b>R</b> K---                                                                                          |    | -----R <b>E</b> S <b>T</b> N <b>Y</b> V-----                                             |
| SDV          | NP_733976    | <i>Sadwavirus</i>      | 53          | ---Q <b>Q</b> Q <b>D</b> I <b>A</b> I---                                              | P <b>L</b> S <b>S</b> ---R <b>F</b> ---                                                                                      |                                                                                                          |    | -----G <b>N</b> H <b>Q</b> S <b>L</b> -----                                              |
| PYMoV        | YP_008567619 | <i>Badnavirus</i>      | 100         | ---N <b>Q</b> V <b>D</b> R <b>T</b> F---                                              | I <b>Q</b> E <b>E</b> ---S <b>H</b> K <b>K</b> L---                                                                          | V <b>K</b> ---                                                                                           |    | -----S <b>G</b> I <b>K</b> F <b>I</b> -----                                              |
| RRV          | YP_004327592 | <i>Emaravirus</i>      | 63          | ---K <b>T</b> Q <b>L</b> L <b>P</b> I---                                              | S <b>V</b> Y <b>N</b> ---E <b>M</b> Y <b>K</b> F---                                                                          | Y <b>M</b> H <b>L</b> ---                                                                                |    | -----K <b>Q</b> P <b>M</b> T-----                                                        |
| TMV          | NP_597748    | <i>Tobamovirus</i>     | 36          | -CS <b>K</b> V <b>D</b> K <b>I</b> M <b>V</b> ---                                     | H <b>E</b> N <b>E</b> ---S <b>L</b> S <b>E</b> V <b>N</b> ---                                                                | L <b>L</b> K <b>G</b> V <b>K</b> ---                                                                     |    | -----L <b>I</b> D <b>S</b> G <b>Y</b> C-----                                             |
| CLBV         | NP_624334    | <i>Citriovirus</i>     | 55          | ---I <b>K</b> L <b>Q</b> A <b>N</b> I---                                              | L <b>T</b> A <b>D</b> ---R <b>L</b> Q <b>S</b> I---                                                                          | R <b>N</b> A <b>K</b> V <b>N</b> ---                                                                     |    | -----G <b>K</b> E <b>A</b> A <b>Y</b> L-----                                             |
| PYFV         | NP_734443    | <i>Sequivirus</i>      | 115         | ---R <b>A</b> E <b>I</b> T <b>P</b> ---                                               | T <b>A</b> A <b>S</b> ---K <b>L</b> D <b>K</b> T---                                                                          | L <b>E</b> A <b>H</b> ---                                                                                |    | -----R <b>A</b> K <b>F</b> N <b>Y</b> M-----                                             |
| RBDV         | NP_620466    | <i>Idaeovirus</i>      | 138         | ---G <b>K</b> N <b>E</b> F <b>S</b> L---                                              | V <b>E</b> A <b>S</b> ---V <b>F</b> D <b>K</b> L---                                                                          | I <b>R</b> K-----                                                                                        |    | -----D <b>D</b> S <b>P</b> I-----                                                        |
| <b>CCGaV</b> |              |                        | 123         | D <b>D</b> T <b>E</b> Q <b>F</b> N <b>L</b> S <b>L</b> ---                            | A <b>V</b> ---                                                                                                               | P <b>K</b> K-----                                                                                        |    | -----G <b>K</b> Q <b>V</b> Y-----                                                        |
| TBSV         | NP_062900    | <i>Tombusvirus</i>     | 32          | ---E <b>D</b> Q <b>E</b> V <b>P</b> L---                                              | L <b>P</b> S <b>N</b> F <b>L</b> T <b>K</b> V <b>R</b> V <b>G</b> ---                                                        |                                                                                                          |    | -----L <b>S</b> G <b>G</b> Y <b>I</b> -----                                              |
| ToTV         | YP_001040018 | <i>Torradovirus</i>    | 66          | ---K <b>K</b> A <b>M</b> E <b>L</b> ---                                               | F <b>D</b> P <b>E</b> D <b>V</b> H <b>N</b> I <b>T</b> S <b>L</b> W <b>S</b> S <b>F</b> K <b>K</b> T <b>F</b> T <b>S</b> --- |                                                                                                          |    | -----S <b>R</b> D <b>H</b> G <b>N</b> L <b>F</b> F-----                                  |
| CaMV         | NP_056724    | <i>Caulimovirus</i>    | 97          | ---G <b>K</b> V <b>Y</b> L <b>P</b> L---                                              | I <b>T</b> K <b>E</b> E <b>I</b> N <b>K</b> R <b>L</b> S <b>S</b> ---                                                        | L <b>K</b> P <b>E</b> V---                                                                               |    | -----R <b>K</b> T <b>M</b> S <b>M</b> V-----                                             |
| CMV          | NP_040776    | <i>Cucumovirus</i>     | 52          | ---A <b>I</b> S <b>V</b> R <b>L</b> P---                                              | V <b>P</b> E <b>V</b> T <b>H</b> G <b>R</b> I <b>A</b> S <b>F</b> ---                                                        | F <b>K</b> S <b>G</b> Y <b>D</b> V---                                                                    |    | -----G <b>E</b> L <b>C</b> S <b>K</b> G <b>Y</b> M-----                                  |
| AMV          | NP_041194    | <i>Alfamovirus</i>     | 60          | ---A <b>P</b> V <b>V</b> L <b>S</b> L---                                              | V <b>S</b> K <b>E</b> K <b>S</b> I <b>L</b> N <b>R</b> M---                                                                  | L <b>P</b> K <b>I</b> G---                                                                               |    | -----Q <b>R</b> M <b>Y</b> V-----                                                        |
| LNyV         | YP_425089    | <i>Cytorhabdovirus</i> | 53          | ---I <b>M</b> R <b>Q</b> V <b>P</b> L---                                              | F <b>D</b> K <b>E</b> ---D <b>L</b> D <b>A</b> M---                                                                          | K <b>S</b> D <b>T</b> ---                                                                                |    | -----T <b>S</b> N <b>K</b> Y <b>L</b> -----                                              |
| AcVb         | YP_004935360 | <i>Vitivirus</i>       | 78          | ---V <b>D</b> Q <b>N</b> I <b>D</b> L---                                              | V <b>D</b> E <b>K</b> ---T <b>I</b> D <b>G</b> L---                                                                          | N <b>E</b> E-----                                                                                        |    | -----K <b>Q</b> P <b>Y</b> L-----                                                        |
| CaLCuV       | NP_624353    | <i>Begomovirus</i>     | 38          | ---L <b>T</b> E <b>I</b> L <b>L</b> ---                                               | Q <b>F</b> P <b>S</b> ---T <b>A</b> A <b>Q</b> F---                                                                          | T <b>A</b> R <b>L</b> ---                                                                                |    | -----N <b>R</b> S <b>C</b> M-----                                                        |

  

|              |              |                        | eeeeeeee                                                                                                                                                                                                                | eeeeeee                                                                                                                                                                                                 | ee eeeee                                                                      |
|--------------|--------------|------------------------|-------------------------------------------------------------------------------------------------------------------------------------------------------------------------------------------------------------------------|---------------------------------------------------------------------------------------------------------------------------------------------------------------------------------------------------------|-------------------------------------------------------------------------------|
| TSWV         | AEK06236     | <i>Tospovirus</i>      | -M <b>S</b> R <b>I</b> V <b>I</b> W <b>V</b> C <b>P</b> T <b>I</b> P <b>N</b> -----                                                                                                                                     | PT <b>G</b> K <b>L</b> V <b>V</b> A <b>L</b> V <b>D</b> P <b>N</b> M <b>P</b> S <b>E</b> -----                                                                                                          | K <b>Q</b> V <b>I</b> L--K <b>G</b> Q <b>G</b> T <b>I</b> T                   |
| RCNMV        | NP_620546    | <i>Dianthovirus</i>    | -N <b>Y</b> T <b>H</b> V <b>L</b> S <b>L</b> A <b>P</b> T <b>I</b> G <b>V</b> -----                                                                                                                                     | A <b>I</b> P <b>G</b> H <b>V</b> T <b>V</b> E <b>L</b> I <b>N</b> P <b>N</b> V <b>E</b> G <b>P</b> -----                                                                                                | F <b>Q</b> V <b>M</b> S <b>G</b> Q <b>T</b> L <b>S</b> W <b>S</b> P <b>G</b>  |
| SBWMV        | NP_049337    | <i>Furovirus</i>       | -S <b>Y</b> S <b>C</b> V <b>L</b> L <b>N</b> V <b>I</b> P <b>T</b> V <b>P</b> M-----                                                                                                                                    | G <b>Y</b> A <b>G</b> T <b>V</b> E <b>V</b> S <b>L</b> L <b>D</b> S <b>G</b> L <b>S</b> P <b>L</b> -----                                                                                                | E <b>N</b> V <b>I</b> P <b>D</b> Q <b>T</b> Q <b>M</b> E <b>I</b> G           |
| CMoV         | YP_002302261 | <i>Umbravirus</i>      | -F <b>I</b> E <b>K</b> L <b>V</b> I <b>V</b> F <b>V</b> P <b>H</b> V <b>P</b> D-----                                                                                                                                    | T <b>S</b> P <b>G</b> Q <b>A</b> V <b>I</b> W <b>V</b> H <b>D</b> T <b>A</b> L <b>P</b> G <b>L</b> -----                                                                                                | E <b>P</b> I <b>G</b> T <b>G</b> Q <b>R</b> V <b>C</b> I <b>P</b> L <b>S</b>  |
| CNSV         | NP_733974    | <i>Nepovirus B</i>     | -K <b>S</b> V <b>V</b> L <b>N</b> L <b>H</b> I <b>R</b> S <b>Y</b> L <b>P</b> Q-----                                                                                                                                    | Q <b>M</b> N <b>A</b> Y <b>A</b> F <b>C</b> V <b>I</b> M <b>W</b> G <b>H</b> S <b>S</b> D <b>A</b> -----                                                                                                | Q <b>E</b> A <b>L</b> -S <b>G</b> S <b>V</b> Y <b>V</b> I <b>G</b>            |
| OuMV         | YP_002019758 | <i>Ourmiavirus</i>     | -T <b>Y</b> D <b>K</b> V <b>L</b> S <b>W</b> K <b>P</b> H <b>V</b> A <b>T</b> -----                                                                                                                                     | G <b>L</b> A <b>R</b> Q <b>I</b> A <b>V</b> V <b>D</b> T <b>R</b> V <b>N</b> H <b>T</b> S <b>I</b> E <b>D</b> L <b>M</b> H <b>K</b> A <b>L</b> W-K <b>T</b> A <b>P</b> V <b>D</b> L <b>G</b>            |                                                                               |
| PoLV         | YP_009032637 | <i>Aureovirus</i>      | -A <b>P</b> I <b>D</b> V <b>K</b> F <b>V</b> L <b>T</b> P <b>H</b> I <b>S</b> E-----                                                                                                                                    | R <b>A</b> Q <b>V</b> R <b>G</b> V <b>V</b> K <b>L</b> V <b>D</b> S <b>R</b> D <b>L</b> S <b>P</b> -----                                                                                                | S <b>R</b> E <b>L</b> Y-R <b>S</b> K <b>E</b> F <b>N</b> I <b>G</b>           |
| CPsV         | YP_089663    | <i>Ophiovirus</i>      | -Q <b>F</b> Y <b>K</b> V <b>Q</b> C <b>M</b> Y <b>I</b> P <b>L</b> F <b>S</b> R <b>V</b> ---                                                                                                                            | D <b>G</b> D <b>N</b> G <b>E</b> I <b>T</b> V <b>S</b> L <b>I</b> D <b>D</b> G <b>K</b> E <b>A</b> A-----                                                                                               | G <b>Q</b> D <b>P</b> I <b>I</b> -Q <b>S</b> I <b>T</b> F <b>D</b> A <b>S</b> |
| CPMV         | NP_734000    | <i>Comovirus</i>       | -H <b>I</b> G <b>A</b> I <b>E</b> I <b>I</b> Q <b>S</b> F <b>A</b> S <b>P</b> ---                                                                                                                                       | E <b>S</b> D <b>L</b> M <b>G</b> G <b>F</b> L <b>L</b> V <b>D</b> S <b>L</b> H <b>T</b> D <b>T</b> -----                                                                                                | A <b>N</b> A <b>I</b> R-S <b>I</b> F <b>V</b> A <b>P</b> M <b>R</b>           |
| CiLV-C       | YP_654542    | <i>Cilevirus</i>       | -Q <b>I</b> S <b>D</b> V <b>L</b> I <b>V</b> P <b>Q</b> I <b>A</b> -----                                                                                                                                                | L <b>P</b> A <b>E</b> L <b>S</b> L <b>K</b> L <b>V</b> D <b>S</b> A <b>N</b> I-----                                                                                                                     | L <b>E</b> A <b>V</b> N-Q <b>E</b> V <b>T</b> V <b>N</b> S <b>T</b>           |
| CRLV         | YP_081449    | <i>Cheravirus</i>      | -S <b>N</b> V <b>A</b> L <b>D</b> M <b>A</b> V <b>Q</b> S <b>H</b> V <b>G</b> Q-----                                                                                                                                    | G <b>T</b> P <b>L</b> L <b>A</b> M <b>C</b> G <b>I</b> M <b>D</b> S <b>R</b> T <b>D</b> D <b>P</b> -----                                                                                                | N <b>E</b> A <b>L</b> Q-V <b>A</b> G <b>Y</b> F <b>D</b> L <b>G</b>           |
| GFLV         | NP_733995    | <i>Nepovirus A</i>     | -V <b>I</b> D <b>A</b> L <b>E</b> I <b>A</b> I <b>N</b> P <b>F</b> G <b>M</b> P-----                                                                                                                                    | G <b>N</b> P <b>T</b> D <b>L</b> T <b>V</b> V <b>A</b> T <b>Y</b> G <b>H</b> E <b>R</b> D <b>M</b> -----                                                                                                | T <b>R</b> A <b>F</b> I-G <b>S</b> A <b>S</b> T <b>F</b> L <b>G</b>           |
| RSV          | NP_620519    | <i>Tenuivirus</i>      | E <b>T</b> F <b>A</b> M <b>V</b> W <b>I</b> G <b>I</b> K <b>G</b> -----                                                                                                                                                 | R <b>A</b> S <b>G</b> I <b>T</b> T <b>L</b> R <b>I</b> D <b>K</b> S <b>Y</b> V <b>N</b> P-----                                                                                                          | S <b>D</b> Q <b>V</b> E-V <b>E</b> V <b>R</b> Y <b>P</b> I <b>S</b>           |
| ACLSV        | NP_040552    | <i>Tricovirus</i>      | -H <b>W</b> G <b>A</b> L <b>S</b> I <b>S</b> I <b>D</b> A <b>L</b> F <b>R</b> K-----                                                                                                                                    | N <b>A</b> G <b>V</b> S <b>G</b> W <b>C</b> Y <b>V</b> Y <b>D</b> N <b>R</b> W <b>E</b> T <b>F</b> -----                                                                                                | E <b>Q</b> A <b>M</b> L-Q <b>K</b> F <b>H</b> F <b>N</b> L <b>D</b>           |
| SDV          | NP_733976    | <i>Sadwavirus</i>      | -H <b>V</b> G <b>E</b> L <b>E</b> I <b>A</b> V <b>Q</b> S <b>S</b> V <b>L</b> T-----                                                                                                                                    | G <b>V</b> D <b>T</b> A <b>M</b> A <b>I</b> M <b>V</b> S <b>D</b> A <b>S</b> H <b>D</b> R <b>L</b> -----                                                                                                | E <b>E</b> G <b>F</b> L-S <b>L</b> T <b>I</b> L <b>R</b> L <b>G</b>           |
| PYMoV        | YP_008567619 | <i>Badnavirus</i>      | -H <b>L</b> G <b>V</b> L <b>Q</b> V <b>R</b> L <b>Q</b> L <b>H</b> R <b>K</b> -----                                                                                                                                     | E <b>E</b> G <b>T</b> L <b>A</b> L <b>V</b> V <b>F</b> R <b>D</b> N <b>R</b> W <b>K</b> G-----                                                                                                          | D <b>K</b> G <b>I</b> I-A <b>T</b> M <b>E</b> V <b>D</b> L <b>T</b>           |
| RRV          | YP_004327592 | <i>Emaravirus</i>      | -R <b>I</b> A <b>S</b> V <b>A</b> L <b>F</b> W <b>T</b> P <b>T</b> S <b>K</b> -----                                                                                                                                     | R <b>F</b> N <b>E</b> M <b>A</b> T <b>L</b> I <b>L</b> M <b>D</b> E <b>R</b> F <b>R</b> D <b>D</b> G <b>I</b> -K <b>Q</b> G <b>K</b> K <b>E</b> L <b>L</b> -A <b>Q</b> G <b>K</b> L <b>N</b> L <b>D</b> |                                                                               |
| TMV          | NP_597748    | <i>Tobamovirus</i>     | --L <b>A</b> G <b>L</b> V <b>V</b> T <b>G</b> E <b>W</b> N <b>L</b> P <b>D</b> -----                                                                                                                                    | N <b>C</b> R <b>G</b> G <b>V</b> S <b>V</b> C <b>L</b> V <b>D</b> K <b>R</b> M <b>E</b> R <b>A</b> -----                                                                                                | D <b>E</b> A <b>T</b> L-G <b>S</b> Y <b>T</b> A <b>A</b> A                    |
| CLBV         | NP_624334    | <i>Citriovirus</i>     | -H <b>L</b> G <b>F</b> V <b>P</b> I <b>A</b> I <b>R</b> S <b>L</b> L <b>P</b> S-----                                                                                                                                    | G <b>N</b> E <b>Q</b> I <b>W</b> G <b>R</b> C <b>A</b> L <b>V</b> D <b>T</b> S <b>R</b> T <b>R</b> A-----                                                                                               | E <b>T</b> A <b>V</b> I-D <b>E</b> F <b>E</b> F <b>K</b> F <b>T</b>           |
| PYFV         | NP_734443    | <i>Sequivirus</i>      | -A <b>I</b> D <b>S</b> I <b>R</b> V <b>A</b> V <b>T</b> S <b>L</b> M <b>H</b> Q-----                                                                                                                                    | G <b>D</b> S <b>R</b> E <b>C</b> I <b>M</b> Y <b>L</b> C <b>D</b> R <b>R</b> F <b>K</b> D <b>P</b> -----                                                                                                | L <b>L</b> G <b>A</b> I-A <b>L</b> I <b>G</b> F <b>T</b> L <b>P</b>           |
| RBDV         | NP_620466    | <i>Idaeovirus</i>      | -H <b>L</b> N <b>R</b> L <b>L</b> I <b>A</b> V <b>L</b> P <b>A</b> V <b>G</b> K-----                                                                                                                                    | G <b>T</b> P <b>G</b> T <b>A</b> R <b>I</b> K <b>I</b> R <b>D</b> A <b>R</b> L <b>D</b> D <b>G</b> -----                                                                                                | Y <b>G</b> E <b>L</b> F--S <b>S</b> E <b>N</b> R <b>V</b> D                   |
| <b>CCGaV</b> |              |                        | -R <b>L</b> S <b>S</b> V <b>M</b> A <b>Y</b> C <b>P</b> L <b>V</b> S <b>S</b> -----                                                                                                                                     | F <b>S</b> E <b>F</b> T <b>K</b> V <b>S</b> I <b>S</b> L <b>H</b> D <b>S</b> R <b>L</b> L <b>S</b> -----                                                                                                | K <b>T</b> C <b>V</b> -Q <b>S</b> A <b>D</b> F <b>N</b> S <b>N</b>            |
| TBSV         | NP_062900    | <i>Tombusvirus</i>     | -T <b>M</b> R <b>R</b> I <b>R</b> I <b>K</b> I <b>I</b> P <b>L</b> V <b>S</b> R-----                                                                                                                                    | K <b>A</b> G <b>V</b> S <b>G</b> K <b>L</b> Y <b>L</b> R <b>D</b> I <b>S</b> D <b>T</b> T-----                                                                                                          | G <b>R</b> K <b>L</b> H-C <b>T</b> E <b>S</b> L <b>D</b> L <b>G</b>           |
| ToTV         | YP_001040018 | <i>Torradovirus</i>    | -H <b>L</b> Y <b>G</b> V <b>M</b> F <b>F</b> M <b>V</b> P <b>H</b> V <b>H</b> G-----                                                                                                                                    | G <b>E</b> G <b>S</b> V <b>K</b> I <b>S</b> L <b>C</b> S <b>S</b> N <b>D</b> P-----                                                                                                                     | T <b>N</b> P <b>V</b> L-Q <b>E</b> K <b>V</b> L <b>Y</b> F <b>S</b>           |
| CaMV         | NP_056724    | <i>Caulimovirus</i>    | -H <b>L</b> G <b>A</b> V <b>K</b> I <b>L</b> L <b>K</b> A <b>Q</b> F <b>R</b> N-----                                                                                                                                    | G <b>I</b> D <b>T</b> P <b>I</b> K <b>I</b> A <b>L</b> I <b>D</b> D <b>R</b> I <b>N</b> S <b>R</b> -----                                                                                                | R <b>D</b> C <b>L</b> L-G <b>A</b> A <b>K</b> G <b>N</b> L <b>A</b>           |
| CMV          | NP_040776    | <i>Cucumovirus</i>     | -S <b>V</b> P <b>Q</b> V <b>L</b> C <b>A</b> V <b>T</b> R <b>I</b> V <b>S</b> T-----                                                                                                                                    | D <b>A</b> E <b>G</b> S <b>L</b> R <b>I</b> Y <b>L</b> A <b>D</b> L <b>G</b> D <b>K</b> E <b>L</b> -----                                                                                                | S <b>P</b> I <b>D</b> G-Q <b>V</b> S <b>L</b> H <b>N</b> H                    |
| AMV          | NP_041194    | <i>Alfamovirus</i>     | -H <b>H</b> S <b>A</b> I <b>Y</b> L <b>L</b> M <b>P</b> N <b>I</b> L <b>K</b> -----                                                                                                                                     | S <b>S</b> S <b>G</b> S <b>I</b> T <b>L</b> K <b>L</b> F <b>N</b> E <b>A</b> T <b>G</b> E-----                                                                                                          | L <b>V</b> D-V <b>D</b> T <b>D</b> H <b>D</b> A <b>T</b>                      |
| LNyV         | YP_425089    | <i>Cytorhabdovirus</i> | -H <b>I</b> G <b>C</b> I <b>T</b> V <b>S</b> I <b>E</b> P <b>L</b> L <b>H</b> Q <b>R</b> Y <b>M</b> K <b>N</b> F <b>G</b> K <b>T</b> I <b>A</b> G <b>N</b> C <b>A</b> I <b>D</b> S <b>T</b> F <b>R</b> K <b>V</b> ----- |                                                                                                                                                                                                         | D <b>Q</b> S <b>I</b> I-S <b>L</b> H <b>K</b> Y <b>D</b> L <b>S</b>           |
| AcVb         | YP_004935360 | <i>Vitivirus</i>       | -H <b>L</b> G <b>C</b> V <b>A</b> I <b>A</b> V <b>I</b> P <b>H</b> G <b>R</b> -----                                                                                                                                     | A <b>M</b> K <b>G</b> T <b>V</b> Q <b>I</b> K <b>V</b> E <b>D</b> Q <b>R</b> F <b>K</b> E-----                                                                                                          | G <b>H</b> G <b>T</b> V-C <b>S</b> F <b>K</b> C <b>D</b> L <b>K</b>           |
| CaLCuV       | NP_624353    | <i>Begomovirus</i>     | -K <b>I</b> D <b>H</b> C <b>V</b> I <b>E</b> Y <b>R</b> Q <b>Q</b> V <b>P</b> I-----                                                                                                                                    | N <b>A</b> T <b>G</b> S <b>V</b> I <b>V</b> E <b>I</b> H <b>D</b> K <b>R</b> M <b>T</b> D-----                                                                                                          | D <b>E</b> S <b>L</b> Q-A <b>S</b> W <b>T</b> F <b>L</b> P <b>L</b> R         |

Figure S4. (Continue in the next page)

|              |              |                        |                                                     |         |   |
|--------------|--------------|------------------------|-----------------------------------------------------|---------|---|
|              |              |                        | eeeee                                               | eee     | e |
| TSWV         | AEK06236     | <i>Tospovirus</i>      | DP-----ICFVF---YLN-----WSIPKM-----NNT-----PENCC     |         |   |
| RCNMV        | NP_620546    | <i>Dianthovirus</i>    | AGK-----PCLMIF---SVH-----HQLNSD-----HEPF            |         |   |
| SBWMV        | NP_049337    | <i>Furovirus</i>       | KGP-----NVMCF---FMH-----YSIPLN-----DKG-----RAVKL    |         |   |
| CMoV         | YP_002302261 | <i>Umbravirus</i>      | SGP-----RLVAF---YPN-----YSIPLS-----DSAM-----NAPRCF  |         |   |
| CNSV         | NP_733974    | <i>Nepovirus B</i>     | DGE-----ATMLQ---LPL-----LCEYVGHN---LQDFEA-----YKRSL |         |   |
| OuMV         | YP_002019758 | <i>Ourmiavirus</i>     | CTY-----TIQGT---VP-----YCLPFHPKEGGDVKSLE-----SQNPI  |         |   |
| PoLV         | YP_009032637 | <i>Aureovirus</i>      | HGL-----VIEGS---QLP-----FCLPVG-----D-----YPL        |         |   |
| CPsV         | YP_089663    | <i>Ophiovirus</i>      | QM-----AMVEL---SMN-----FVVEKK-----D-----MDFI        |         |   |
| CPMV         | NP_734000    | <i>Comovirus</i>       | GGR-----PVRVVT---FPN-----TLAPVS-----CD-----LNNRF    |         |   |
| CiLV-C       | YP_654542    | <i>Cilevirus</i>       | GGP-----CVVVM---NCA-----HSIPNE-----DRTHVNGSEVHRRL   |         |   |
| CRLV         | YP_081449    | <i>Cheravirus</i>      | RDR-----CDLIS---LPL-----INFPLNK-----EDFDD-----YMRGL |         |   |
| GFLV         | NP_733995    | <i>Nepovirus A</i>     | NGL-----ARAFI---FPG-----LQYSQE-----EPR-----RESII    |         |   |
| RSV          | NP_620519    | <i>Tenuivirus</i>      | KNF-----AVLGS---LAN-----FLALE-----DK-----HNL        |         |   |
| ACLSV        | NP_040552    | <i>Tricovirus</i>      | SGS-----ATLVT---SPN-----FPVSLD-----DPG-----LSNSI    |         |   |
| SDV          | NP_733976    | <i>Sadwavirus</i>      | AGW-----MRHTI---PIG-----ITVFTPT-----DPL-----VDRFL   |         |   |
| PYMoV        | YP_008567619 | <i>Badnavirus</i>      | KGC-----QMVYI---IPD-----IMMTVN-----DF-----YHNI      |         |   |
| RRV          | YP_004327592 | <i>Emaravirus</i>      | LMG-----TVITAVFPDPNFQQFVTGSLDFATDTK-----D-----INKI  |         |   |
| TMV          | NP_597748    | <i>Tobamovirus</i>     | KKR-----FQFKV---VPN-----YAITTQ-----DA-----MKNVW     |         |   |
| CLBV         | NP_624334    | <i>Citriovirus</i>     | KKQPF---ASKLLTI---NAAVD-----INCKVSVG-----SI         |         |   |
| PYFV         | NP_734443    | <i>Sequivirus</i>      | GMQTHVYKTRMMAF---SRK-----EAIAAD-----RL              |         |   |
| RBDV         | NP_620466    | <i>Idaeovirus</i>      | SG-----VIYCI---NVG-----YSVPKS-----EIDY              |         |   |
| <b>CCGaV</b> |              |                        | IT-----QKVEL---SLD-----YCIPT-----SCSKI              |         |   |
| TBSV         | NP_062900    | <i>Tombusvirus</i>     | REI-----RLTMQ---HLD-----FSVSTR-----SDVPI            |         |   |
| ToTV         | YP_001040018 | <i>Torradovirus</i>    | GGA-----QAVLM---SPT-----ITLPPV-----KRG-----PMF      |         |   |
| CaMV         | NP_056724    | <i>Caulimovirus</i>    | YGK-----FMFTV---YPK-----FGISLN-----TQR-----LNQTL    |         |   |
| CMV          | NP_040776    | <i>Cucumovirus</i>     | DLP-----ALVSF---QPT-----YDCPME-----TVGN-----RKRCF   |         |   |
| AMV          | NP_041194    | <i>Alfamovirus</i>     | QA-----CIFAG---RYP-----RSILAK-----DAA-----KGHDL     |         |   |
| LNYV         | YP_425089    | <i>Cytorhabdovirus</i> | RGR-----ADYVS---YPN-----HCLSLT-----DPM-----IQKRL    |         |   |
| AcVB         | YP_004935360 | <i>Vitivirus</i>       | DAL-----SAYAS---FPG-----YFVSTT-----DVK-----NGYAL    |         |   |
| CaLCuV       | NP_624353    | <i>Begomovirus</i>     | CNI-----DLHYF---SSS-----FFSLK-----DP-----IPW        |         |   |
|              |              |                        |                                                     |         |   |
|              |              |                        | eeeeeee                                             | eeeeeee |   |
| TSWV         | AEK06236     | <i>Tospovirus</i>      | <b>QLHLMCSQ</b> ---EYKKG---VSFGSVMSW-----           |         |   |
| RCNMV        | NP_620546    | <i>Dianthovirus</i>    | RVRITNTG--IPTK-KSYARCHAYW-----                      |         |   |
| SBWMV        | NP_049337    | <i>Furovirus</i>       | AFKIDAEM--ASKG-MSVMNVYSW-----                       |         |   |
| CMoV         | YP_002302261 | <i>Umbravirus</i>      | SLVTQLEGVRLQGG-ASAFSLYSMW-----                      |         |   |
| CNSV         | NP_733974    | <i>Nepovirus B</i>     | VLSTVFPFESGIADGKAMFGITSIEF---                       |         |   |
| OuMV         | YP_002019758 | <i>Ourmiavirus</i>     | RGIVYITDSRY-----                                    |         |   |
| PoLV         | YP_009032637 | <i>Aureovirus</i>      | QFEVTVLQSQFRET-ANLYSTSVIEW-----                     |         |   |
| CPsV         | YP_089663    | <i>Ophiovirus</i>      | GIHVSAENVPVQD--RAYGSINLAF-----                      |         |   |
| CPMV         | NP_734000    | <i>Comovirus</i>       | KLICSLPNCDIVQG-SQVAEVSNNV-----                      |         |   |
| CiLV-C       | YP_654542    | <i>Cilevirus</i>       | GIQYQVDCDNISGR-VTFFSITALW-----                      |         |   |
| CRLV         | YP_081449    | <i>Cheravirus</i>      | YLCTMFHNVRGFQNNKALCSYSA-----                        |         |   |
| GFLV         | NP_733995    | <i>Nepovirus A</i>     | RLYVASTNATVDTD-SVLAASVGT-----                       |         |   |
| RSV          | NP_620519    | <i>Tenuivirus</i>      | QVSVSVDDSSVQNC---VISRTLWFW---                       |         |   |
| ACLSV        | NP_040552    | <i>Tricovirus</i>      | SVAVMFENLNFKFE-SYPISVRVGN-----                      |         |   |
| SDV          | NP_733976    | <i>Sadwavirus</i>      | RLSVLTGGSPMADG-RQVARLHYGL-----                      |         |   |
| PYMoV        | YP_008567619 | <i>Badnavirus</i>      | HISVLTTRGYEGWQHGEANLLVTRGM-----                     |         |   |
| RRV          | YP_004327592 | <i>Emaravirus</i>      | KFYISFPDTRM-----                                    |         |   |
| TMV          | NP_597748    | <i>Tobamovirus</i>     | QVLVNIIRNVKMSAG-FCPLSLEFVSVCIIVY                    |         |   |
| CLBV         | NP_624334    | <i>Citriovirus</i>     | QVLELHGVDLREE-RSVAII-----                           |         |   |
| PYFV         | NP_734443    | <i>Sequivirus</i>      | QLYLYVKAKLERTQNTPI TVNVRT-----                      |         |   |
| RBDV         | NP_620466    | <i>Idaeovirus</i>      | KINIDFAGVPIKDG-KSPIWVKAFF-----                      |         |   |
| <b>CCGaV</b> |              |                        | TLNIAREQKFLQEG-EEWATVQLLIRL---                      |         |   |
| TBSV         | NP_062900    | <i>Tombusvirus</i>     | VFGFEELVSPFLEG-RELFISISRW-----                      |         |   |
| ToTV         | YP_001040018 | <i>Torradovirus</i>    | YYTMECLGTRA---QIPCSVVAIW-----                       |         |   |
| CaMV         | NP_056724    | <i>Caulimovirus</i>    | SLIHDFENKNLMNKGDKVMTITYVV-----                      |         |   |
| CMV          | NP_040776    | <i>Cucumovirus</i>     | AVVIERHGYIQYT--GTASVCSNW-----                       |         |   |
| AMV          | NP_041194    | <i>Alfamovirus</i>     | KLVVHAVASTNAN--SAVGVLPIW-----                       |         |   |
| LNYV         | YP_425089    | <i>Cytorhabdovirus</i> | SVLLGIKIDVEPG-VELFSICIGY-----                       |         |   |
| AcVB         | YP_004935360 | <i>Vitivirus</i>       | NLKVKAEGMCMEVG-VHPLSIQMHC-----                      |         |   |
| CaLCuV       | NP_624353    | <i>Begomovirus</i>     | KLYYRVSDTNVHQR-THFAKFKGL-----                       |         |   |

**Figure S4. Multiple sequence alignment of movement proteins from citrus concave gum-associated virus (CCGaV) and plant viruses of the 30K superfamily. Sequences are from representative members of the virus genera in the 30K super-family. CCGaV is shown in bold.** The virus name, the GenBank identifier, the virus genus and the distance in amino acids from the N- terminus of the protein are shown on the left side of each sequence. Consensus secondary structure elements, predicted by PSIREED within the PROMALS3D program, are reported at the top with the strands and helices indicated with e and h, respectively. Amino acids that fold in helices and strands are in red and blue, respectively. The nearly invariant aspartic acid residue (the D motif) is shown in bold.
